# Supplementary material for: Generation of a functional, semisynthetic [FeFe]-hydrogenase in a photosynthetic microorganism
Source: Royal Society of Chemistry journal article supplement (doi:10.1039/c8ee01975d), 2018-01-01
Supplement: c8ee01975d1.pdf [file c8ee01975d1.pdf]

## Generation of a functional, semisynthetic [FeFe]-hydrogenase in a photosynthetic microorganism

Adam Wegelius<sup>a</sup>, Namita Khanna<sup>a,e</sup>, Charlène Esmieu<sup>b</sup>, Giovanni David Barone<sup>a</sup>, Filipe Pinto<sup>c,d,f</sup>, Paula Tamagnini<sup>c,d</sup>, Gustav Berggren<sup>b,\*</sup> and Peter Lindblad<sup>a,\*</sup>

<sup>a</sup> Microbial chemistry, Department of Chemistry-Ångström, Uppsala University, Box 523, SE-751 20 Uppsala, Sweden.

<sup>b</sup> Molecular Biomimetics, Department of Chemistry-Ångström, Uppsala University, Box 523, SE-751 20 Uppsala, Sweden.

<sup>c</sup> i3S - Instituto de Investigação e Inovação em Saúde & IBMC - Instituto de Biologia Molecular e Celular, Universidade do Porto, 4200-135 Porto, Portugal.

<sup>d</sup> Faculdade de Ciências, Departamento de Biologia, Universidade do Porto, 4169-007 Porto, Portugal.

<sup>e</sup> Current address: Department of Biotechnology, Birla Institute of Technology & Science, Pilani Dubai Campus, Dubai International Academic City, P.O. Box 345055, Dubai, UAE

<sup>f</sup> Current address: School of Biological Sciences & Centre for Synthetic and Systems Biology, University of Edinburgh, Edinburgh EH9 3FF, UK

## Methods

### General

[Fe<sub>2</sub>(adt)(CN)<sub>2</sub>(CO)<sub>4</sub>]<sup>2-</sup> (complex 1, adt = -SCH<sub>2</sub>NHCH<sub>2</sub>S-) was synthesized in accordance to literature protocols with minor modifications, and verified by FTIR spectroscopy<sup>14</sup>. All anaerobic work was performed in an MBRAUN Labmaster glovebox under argon atmosphere ([O<sub>2</sub>] ≤ 5 ppm).

### Strains and growth conditions

*Synechocystis* sp. strain PCC 6803 wild-type (*Synechocystis* WT) and *Synechocystis* sp. strain PCC 6803  $\Delta$ *hoxYH*<sup>25</sup> (*Synechocystis*  $\Delta$ *hox*) cells were routinely cultured in BG11 media at 30 °C, under a continuous irradiance of 40  $\mu$ mol of photons m<sup>-2</sup> s<sup>-1</sup>. *Synechocystis*  $\Delta$ *hox* CrHydA1 and *Synechocystis* WT CrHydA1 engineered cells were cultivated under similar conditions, except that the media was supplemented with kanamycin to a final concentration of 50  $\mu$ g mL<sup>-1</sup>. When required, after cultivation in BG11 media to O.D.<sub>750nm</sub> = 0.2 - 0.3, combined nitrogen step down was carried out by centrifuging cells at 5,000  $\times$  g for 5 mins, washing three times in BG11<sub>0</sub> media and suspending the cells to a final O.D.<sub>750nm</sub> = 0.2. The combined nitrogen starved cells were harvested 12 – 14 h after inoculation for further experiments.

All cloning was done using *Escherichia coli* strain DH5 $\alpha$  Z1 grown at 37 °C in Luria broth (LB) liquid medium, and on plates containing LB medium solidified with 1 % (w/v) agar supplemented with 50  $\mu$ g mL<sup>-1</sup> kanamycin.

## Plasmid construction and transformation

All primers were supplied by Eurofins Genomics and are listed in **Supplementary Table 1**. The *hydA1*-terminator fragment was amplified using HydA-F1 and Hyd-R1 primers, template was kindly provided by Prof. Alfonso Jaramillo, University of Warwick, UK. The resulting fragment was amplified with HydA-F2 and Hyd-R2 primers and cloned into broad host range shuttle vector pPMQAK1<sup>26</sup> with restriction digestion (FastDigest EcoRI and SpeI, Thermo Fisher Scientific) and ligation (Quick Ligation Kit, New England Biolabs). The subsequent amplifications with forward primers HydA-F1 and HydA-F2 facilitated the two-step addition of a  $P_{trc_{core}}$ <sup>27</sup> promoter and a bicistronic adaptor, BCD2<sup>28</sup>, to the open reading frame of *hydA1*. The annotated sequence of the resulting *hydA1* expression unit can be seen in **Supplementary Note 1**. 1  $\mu$ g of plasmid DNA was transformed into 100  $\mu$ L, early mid log phase ( $\sim$  O.D.750nm = 0.3) *Synechocystis*  $\Delta$ *hox* and *Synechocystis* WT cells. The cell suspensions were incubated at 30 °C in low light for 3-4 h after which they were spread on nitrocellulose filter placed on BG11 agar. After 24 h the filter was moved to BG11 agar supplemented with kanamycin (50  $\mu$ g mL<sup>-1</sup>). The resultant colonies were screened for positive clones by PCR and sequencing. Expression of pro-HydA1 was confirmed with Western Blot.

## Hydrogen production assays

100 mL culture of O.D.750nm = 0.2 was centrifuged at 5000 rpm, concentrated 50 X by supplementing with fresh BGII or BGII<sub>0</sub> media containing appropriate concentrations of antibiotic, sparged with argon for 10 min and transferred to the glovebox. Where necessary, the media was supplemented with 30  $\mu$ M DCMU and/or 100  $\mu$ M DBMIB and/or 30  $\mu$ M DCC and/or 5 mM glucose. Thereafter the cells were transferred into 8 mL glass vials, and 100  $\mu$ g of complex **1** was added from a stock solution of **1** in potassium phosphate buffer (100 mM, pH 6.8). The volume of complex **1** solution was always maintained to less than 5 % (v/v) of the total reaction volume. Following 10 min incubation, the glass vials were sealed with rubber septa inside the glovebox and the samples were incubated at 30 °C on a rotary shaker either under 100  $\mu$ mol photons m<sup>-2</sup> s<sup>-1</sup> or in darkness after wrapping the vials with aluminum foil. The evolution of hydrogen was monitored by injecting 100  $\mu$ L of the headspace gas into a gas chromatograph.

## Hydrogen measurements by GC

Hydrogen content was determined using a gas chromatograph (GC; PerkinElmer LLC, MA, USA) equipped with a thermal conductivity detector (TCD) and a stainless-steel column packed with Molecular Sieve (60/80 mesh). A calibration curve was established by injecting known amounts of hydrogen. The operational temperatures of the injection port, the oven and the detector were 100 °C, 80 °C and 100 °C, respectively. Argon was used as the carrier gas at a flow rate of 35 mL min<sup>-1</sup>.

14. Li, H. and Rauchfuss, T.B. 2002. Iron carbonyl sulfides, formaldehyde, and amines condense to give the proposed azadithiolate cofactor of the Fe-only hydrogenases. *Journal of the American Chemical Society* 124(5), 726–727.
25. Pinto, F., van Elburg, K.A., Pacheco, C.C., Lopo, M., Noirel, J., Montagud, A., Urchueguía, J.F., Wright, P.C. and Tamagnini, P. 2012. Construction of a chassis for hydrogen production: Physiological and molecular characterization of a *Synechocystis* sp. PCC 6803 mutant lacking a functional bidirectional hydrogenase. *Microbiology* 158(2), 448–464.
26. Huang, H.H., Camsund, D., Lindblad, P. and Heidorn, T. 2010. Design and characterization of molecular tools for a Synthetic Biology approach towards developing cyanobacterial biotechnology. *Nucleic Acids Research* 38(8), 2577–2593.
27. Camsund, D., Heidorn, T. and Lindblad, P. 2014. Design and analysis of LacI-repressed promoters and DNA-looping in a cyanobacterium. *Journal of Biological Engineering* 8(1), 4.
28. Mutalik, V.K., Guimaraes, J.C., Cambray, G., Lam, C., Christoffersen, M.J., Mai, Q.-A., Tran, A.B., Paull, M., Keasling, J.D., Arkin, A.P. and Endy, D. 2013. Precise and reliable gene expression via standard transcription and translation initiation elements. *Nature Methods* 10(4), 354–60.

## Supplementary Information

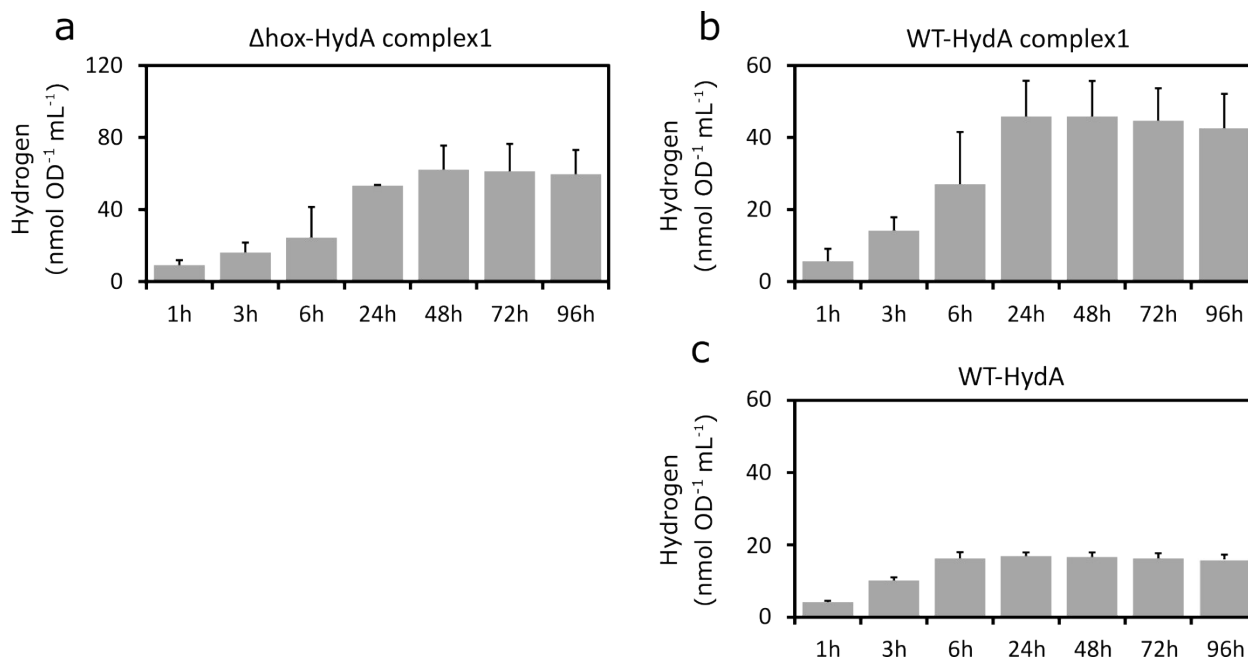

**Supplementary Figure 1.** Time profiles of hydrogen accumulation from living cells of *Synechocystis* PCC 6803 WT and *Synechocystis* PCC 6803  $\Delta hox$  expressing pro-HydA1 from *Chlamydomonas reinhardtii*. 100  $\mu\text{g}$  (a,b) or 0  $\mu\text{g}$  (c) **complex 1** was added to anaerobic cultures in media supplemented with glucose. Hydrogen was measured at indicated times. Columns represent accumulated hydrogen in nmol per mL culture, normalized to culture optical density (O.D.750nm). Data points represent means of 2-4 independent experiments. Error bars represent S.D.

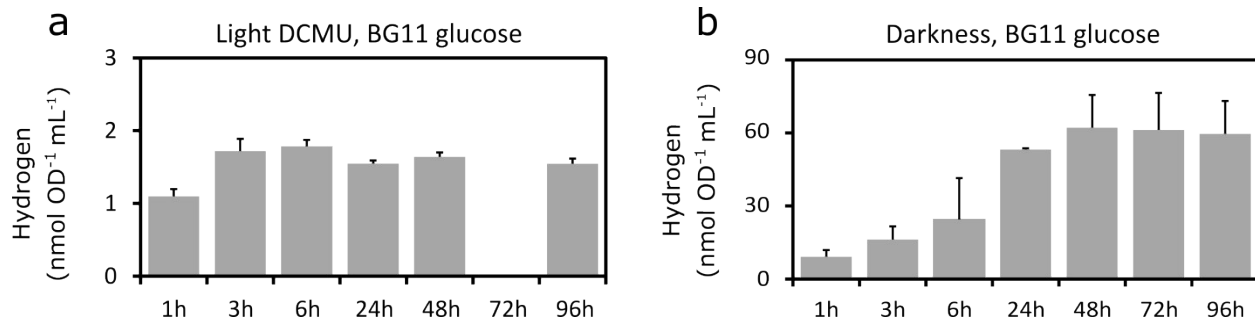

**Supplementary Figure 2.** Time profiles of hydrogen accumulation from living cells of *Synechocystis* PCC 6803  $\Delta hox$  harboring an activated CrHydA1, incubated in BG11 medium supplemented with glucose in **(a)** light with DCMU inhibition and **(b)** darkness. Columns represent accumulated hydrogen in nmol per mL culture, normalized to culture optical density (O.D.750nm). Data points represent means of 2-4 independent experiments. Error bars represent S.D.

**Supplementary Table 1.** Oligonucleotide primers

| Primer  | Sequence 5' - 3'                                                                                    |
|---------|-----------------------------------------------------------------------------------------------------|
| HydA-F1 | agttcacttaaaaaggagatcaacaatgaaagcaattttcgactgaaacatcttaatcatgctaaggaggtttct<br>aatggctgctcctgctgctg |
| HydA-R1 | aaaaaaaaaccccgccctgctg                                                                              |
| HydA-F2 | ttgaattcgagctgtgacaattgtgagcgctcacaatataatgtgtggaagggcccaagttcacttaaaaagga<br>gatcaac               |
| HydA-R2 | cgctactagtaaaaaaaaaaccccgccctgctg                                                                   |

**Supplementary Note 1**

*hydA1* expression unit sequence used in this study.

gagctgttgacaattgtgagcgctcacaatataatgtgtggaaggcccaagttcacttaaaaaggagatcaacaatgaaagcaattttcg  
tactgaaacatcttaatcatgctaaggaggtttctaatggctgctcctgctgctgaagctccttaagtcattgtacaacaagcattagcaga  
gtagctaaacctaaagatgatccacacgcaagcagctgtgctgccaagtcgctcccgcagtgcgagtagctatcgctgaaacattaggt  
ttggctcccggagccaccaccctaagcaattagccgaaggttacgtcgtctcggtttcgatgaagttttgataccttattggctgctgacc  
tcactatcatggaagaaggttctgagttattacatcgattgaccgaacattagaagccatccccatagtgatgaacctctccccatgttta  
cttctgttccccgggttgatcgctatgctcgaaaaatcttatcccacctcattccttatgtaagctcttgcaaatctccccaaatgatgtt  
agccgcgatggttaaaagctattggccgagaagaagggcattgctccaaagacatggtgatggtcagtattatgcctgtactcgaaa  
caaagtgaagctgatcgagactggttttgcgttgatgctgatccactctccccaattggaccatgtaatcactaccgtagaactcggcaa  
catctttaaagaacgaggtatcaattagcagaattaccgagggatgaatgggataatccccatgggagtaggttagtgccgggtgctctg  
tttgaaccactggaggcgtcatggaagctgcttacgaacagcttatgaactcttactggaaccccttaccctgattatcttatccgag  
gtccgcgcatggatggatcaaagaacaaatattactatggtccctgctgctggtcccaaatcgaagagtactcaaacatcgcgcg  
gctgctcgagccgaagccgctcatggcactcctggccccctgcttgggatggtggagcaggctttacatccgaagatggacgcggc  
ggaattactttgcgctgctgtggccaacggcttaggtaatgctaagaaattgatcacaagatgcaagcgggtgaagccaatacagatt  
tcgctgagatcatggatgtctgcccgttgtgttgggtggtggtcaaccccgaagtactgataaagcgatcacgaaaaacccaagc  
agcgttatacaattagacgaaaaatctacgttgcgctgcatgagaatccctctatccgagaattatgacacttattaggagaac  
ccttaggtcataaagcgcgatgaactctacatactcattacgtcggtTAATAAaaaaaaaaaccccgccctgacagggcggggtttttt  
tt

Legend:

**P<sub>trc</sub><sub>core</sub>**  
**Bicistronic design (BCD)** including **RBS I** and **RBS II**  
*hydA1*  
**Terminator (BB006)**
